# Supplementary figures and images for: Understanding the electrocatalytic oxidation of propionic acid for the sustainable production of ethylene
Source: Royal Society of Chemistry journal article supplement (doi:10.1039/d3su00347g), 2023-01-01

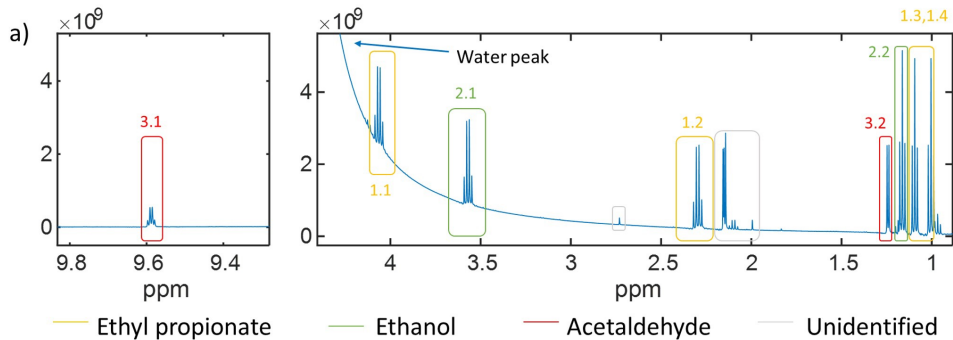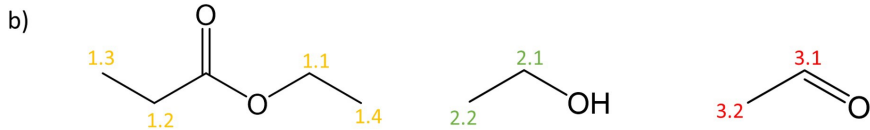

Supplement: d3su00347g10.pdf [file d3su00347g10.pdf]

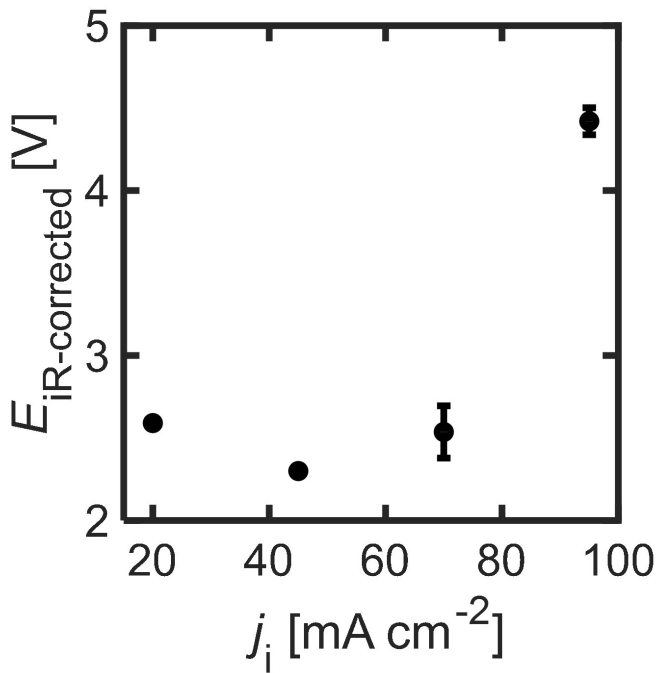

Supplement: d3su00347g2.pdf [file d3su00347g2.pdf]

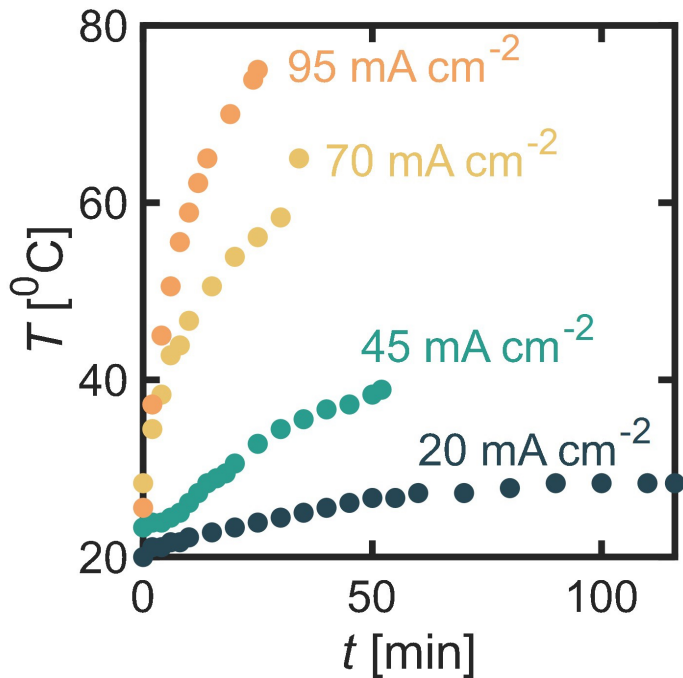

Supplement: d3su00347g3.pdf [file d3su00347g3.pdf]

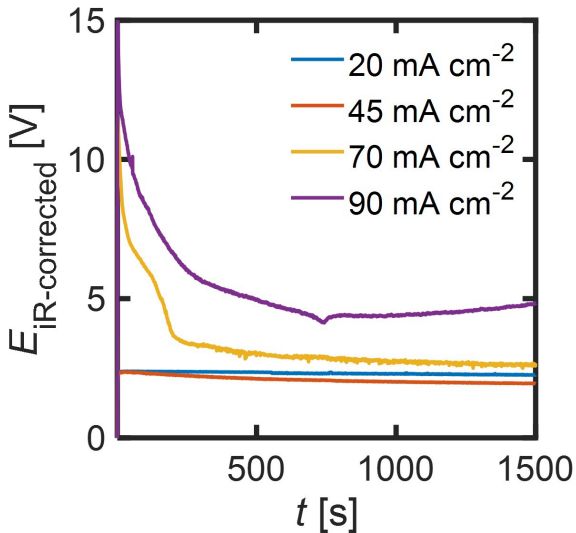

Supplement: d3su00347g4.pdf [file d3su00347g4.pdf]

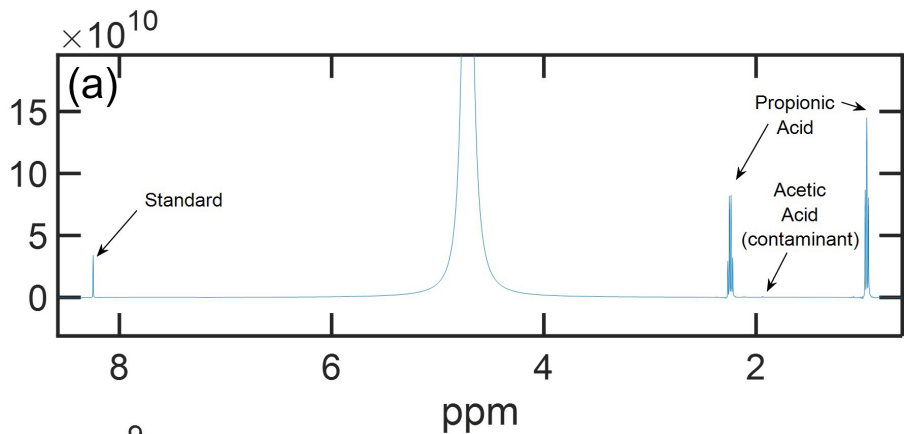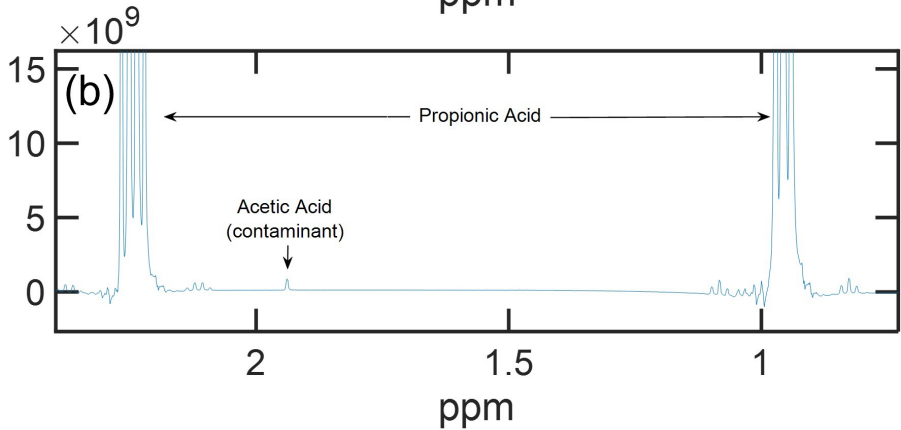

Supplement: d3su00347g5.pdf [file d3su00347g5.pdf]

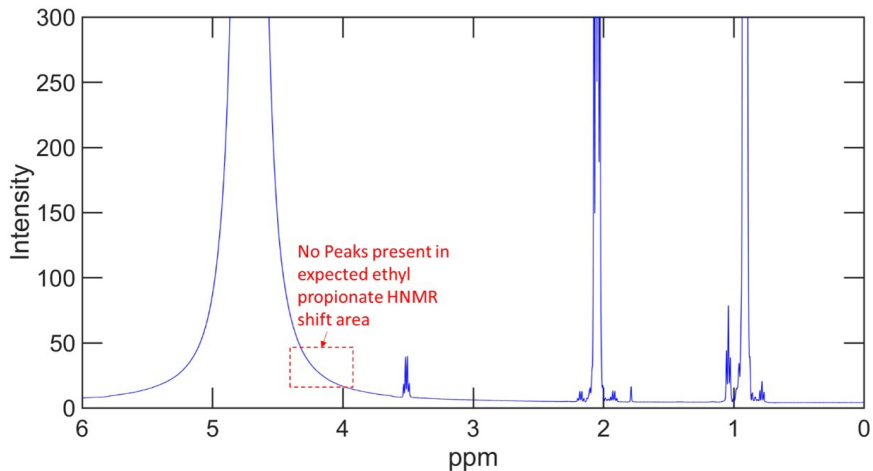

Supplement: d3su00347g6.pdf [file d3su00347g6.pdf]

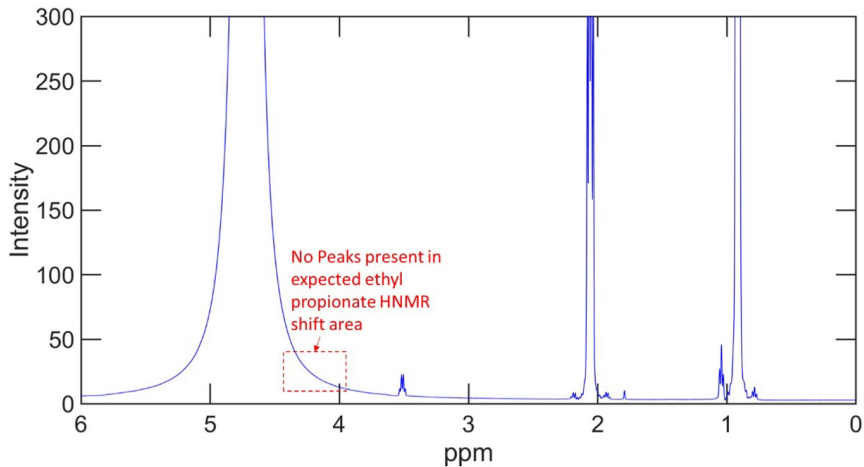

Supplement: d3su00347g7.pdf [file d3su00347g7.pdf]

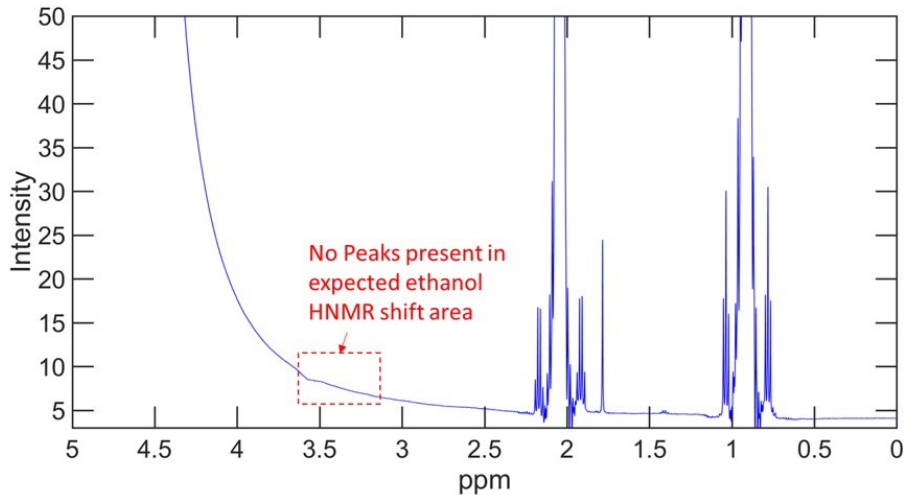

Supplement: d3su00347g8.pdf [file d3su00347g8.pdf]

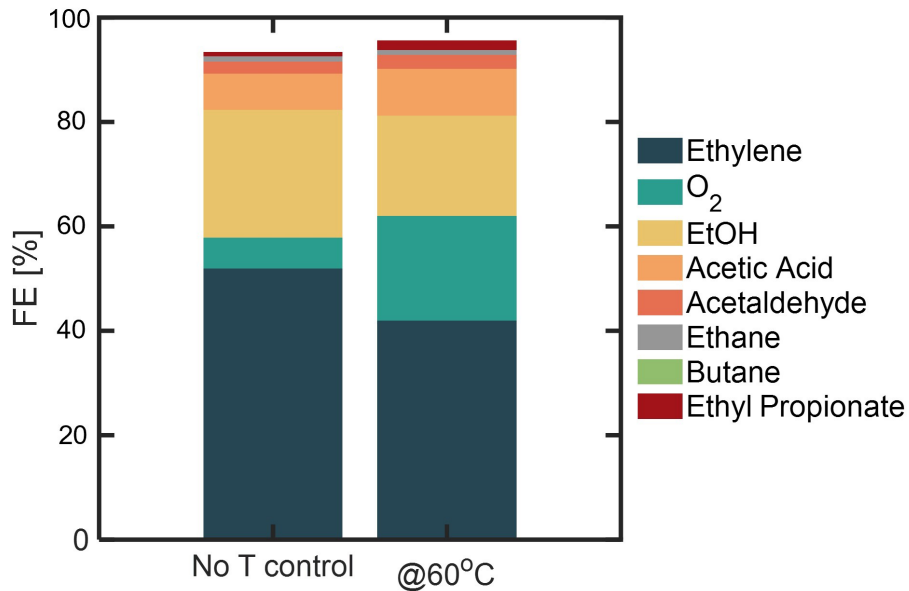

Supplement: d3su00347g9.pdf [file d3su00347g9.pdf]
